# Supplementary material
Source: publisher figshare collection journal article supplement (https://sage.figshare.com/ndownloader/files/20045738)
Supplement: Supplementary file 1 [file 20045738]

Supplemental Materials

Table A.1.

Alternative Estimator (Ordered Logit).

|  | (1) | (2) | (3) | (4) |
| --- | --- | --- | --- | --- |
|  | Rebel | Rebel | Conditional | Conditional |
|  | Strength | Strength | on Territory | on Territory |
| Any Governance | 0.094 | –0.264 | –0.492 | –1.236* |
| (0.457) | (0.577) | (0.558) | (0.689) |
| Secessionist | –0.382 | 0.074 | 0.778 | 1.777** |
| (0.566) | (0.608) | (0.755) | (0.775) |
| Communist | –0.695 | –1.460** | –0.447 | –0.992 |
| (0.469) | (0.596) | (0.675) | (0.904) |
| Rebel Group Size | 1.074*** | 1.382*** | 1.099** | 1.749*** |
| (0.215) | (0.291) | (0.491) | (0.532) |
| Territorial Control | 1.222*** | 1.111** |  |  |
| (0.473) | (0.465) |  |  |
| Competition | –0.315** | –0.347** | –0.333** | –0.323** |
| (0.125) | (0.141) | (0.144) | (0.144) |
| Infant Mortality | 0.003 | 0.001 | 0.001 | 0.002 |
| (0.006) | (0.007) | (0.008) | (0.011) |
| GDPpc | –0.312 | –0.377 | –0.385 | –0.698* |
| (0.271) | (0.304) | (0.407) | (0.410) |
| Population (logged) | –0.871*** | –1.005*** | –1.100** | –1.773*** |
| (0.184) | (0.232) | (0.444) | (0.387) |
| Rugged Terrain | –0.082 | –0.112 | –0.055 | –0.163 |
| (0.177) | (0.194) | (0.325) | (0.354) |
| Non-Military Aid |  | –0.653 |  | –0.595 |
|  | (0.638) |  | (1.055) |
| cut1 | –9.944*** | –11.282** | –14.933** | –23.922*** |
| (3.426) | (4.556) | (6.792) | (6.758) |
| cut2 | –5.174 | –5.746 | –10.747 | –18.643*** |
| (3.373) | (4.428) | (6.580) | (6.278) |
| cut3 | –3.402 | –3.809 | –8.419 | –15.462** |
| (3.440) | (4.525) | (6.610) | (6.517) |
| cut4 | –1.399 | –1.927 | –6.840 | –14.096** |
| (3.639) | (4.677) | (6.954) | (6.841) |
| Observations | 134 | 107 | 53 | 47 |
| Pseudo | 0.378 | 0.424 | 0.294 | 0.419 |

*Note:* Ordered logistic regression coefficients reported and standard errors are in parentheses. Standard errors are clustered by country. Across all models, the dependent variable in Appendix Table A.1 is *Rebel Strength*: a five-value indicator variable. Positive coefficients indicate that independent variables are associated with higher levels of rebel group strength, while negative coefficients indicate that independent variables are associated with lower levels of rebel group strength Models 1 and 2 present the results for all rebel groups in the sample for which data are available. Models 3 and 4 present the results for all rebel groups that control territory and for which data are available. *, **, ***.

Table A.2.

Alternative Estimator with Most Inclusive Rebel Governance.

|  | (1) | (2) | (3) | (4) |
| --- | --- | --- | --- | --- |
|  | Rebel | Rebel | Conditional | Conditional |
|  | Strength | Strength | on Territory | on Territory |
| Most Inclusive Governance | –0.966 | –1.391* | –2.712** | –5.148*** |
| (0.694) | (0.739) | (1.113) | (1.589) |
| Secessionist | –0.382 | 0.178 | 1.542 | 3.752*** |
| (0.608) | (0.680) | (1.136) | (1.361) |
| Communist | –0.653 | –1.544*** | –0.449 | –1.014 |
| (0.456) | (0.520) | (0.635) | (0.911) |
| Rebel Group Size | 1.170*** | 1.504*** | 1.566** | 3.182*** |
| (0.224) | (0.297) | (0.654) | (0.829) |
| Territorial Control | 1.292*** | 1.172** |  |  |
| (0.480) | (0.467) |  |  |
| Competition | –0.279** | –0.301** | –0.232 | –0.144 |
| (0.122) | (0.139) | (0.157) | (0.157) |
| Infant Mortality | 0.006 | 0.005 | 0.006 | 0.004 |
| (0.007) | (0.009) | (0.009) | (0.013) |
| GDPpc | –0.220 | –0.304 | –0.235 | –0.756 |
| (0.274) | (0.318) | (0.378) | (0.543) |
| Population (logged) | –0.879*** | –1.011*** | –1.191** | –2.273*** |
| (0.190) | (0.223) | (0.565) | (0.610) |
| Rugged Terrain | –0.043 | –0.083 | –0.147 | –0.632 |
| (0.173) | (0.189) | (0.386) | (0.445) |
| Non-Military Aid |  | –0.625 |  | –0.835 |
|  | (0.604) |  | (1.260) |
| cut1 | –8.265** | –9.386* | –11.180 | –21.570* |
| (3.793) | (5.122) | (8.087) | (11.034) |
| cut2 | –3.357 | –3.566 | –6.365 | –13.874 |
| (3.692) | (4.949) | (7.799) | (10.543) |
| cut3 | –1.604 | –1.656 | –3.870 | –9.628 |
| (3.783) | (5.079) | (7.886) | (10.400) |
| cut4 | 0.448 | 0.295 | –2.171 | –8.076 |
| (3.958) | (5.143) | (8.191) | (10.577) |
| Observations | 133 | 106 | 52 | 46 |
| Pseudo | 0.387 | 0.437 | 0.358 | 0.553 |

*Note:* Ordered logistic regression coefficients reported and standard errors are in parentheses. Standard errors are clustered by country. Across all models, the dependent variable in Appendix Table A.2 is *Rebel Strength*: a five-value indicator variable. Positive coefficients indicate that independent variables are associated with higher levels of rebel group strength, while negative coefficients indicate that independent variables are associated with lower levels of rebel group strength Models 1 and 2 present the results for all rebel groups in the sample for which data are available. Models 3 and 4 present the results for all rebel groups that control territory and for which data are available. *, **, ***.
